# Supplementary material
Source: publisher figshare collection journal article supplement (https://tandf.figshare.com/ndownloader/files/22661387)
Supplement: Supplementary file 1 [file 22661387]

Supplementary Materials of

**CuS-NiS2 nanomaterials for MRI guided phototherapy of** [**gastric**](javascript:;)[**carcinoma**](javascript:;) **via triggering mitochondria-mediated apoptosis and MLKL/CAPG-mediated necroptosis**

Jian Chen a, b, c, #, Rongjun Zhang d, #, Cheng Tao a, b, c, #, Xiaofei Huang e, Zide Chen a, Xinping Li b, c, Jianlong Zhou d, Qiang Zeng a, b, c, Bingxia Zhao d, Miaomiao Yuan f, d, *, Min Ma g, h, a, *, Zhengzhi Wu b, c, f, a, *

a. Integrated Chinese and Western Medicine Postdoctoral Research Station, Jinan University, Guangzhou 510632, China

b. The First Affiliated Hospital of Shenzhen University, Shenzhen Second People's Hospital, Shenzhen 518035, China

c. Shenzhen Institute of Geriatrics, Shenzhen 518020, China

d. Cancer Research Institute, School of Basic Medical Sciences, Southern Medical University, Guangzhou 510515, China

e. Research Center of Integrative Medicine, School of Basic Medical Sciences, Guangzhou University of Chinese Medicine, Guangzhou 510006, China

f. The Eighth Affiliated Hospital of Sun Yat-sen University, Shenzhen 518033, China

g. College of Traditional Chinese Medicine, Jinan University, Guangzhou 510632, China

h. The First Affiliated Hospital of Jinan University, Guangzhou 510630, China

# Jian Chen, Rongjun Zhang and Cheng Tao contributed equally to this work

* Corresponding author：

Miaomiao Yuan: yuanmm2019@163.com

Min Ma: [tmamin@jnu.edu.cn](mailto:tmamin@jnu.edu.cn)

Zhengzhi Wu: szwzz001@email.szu.edu.cn

**
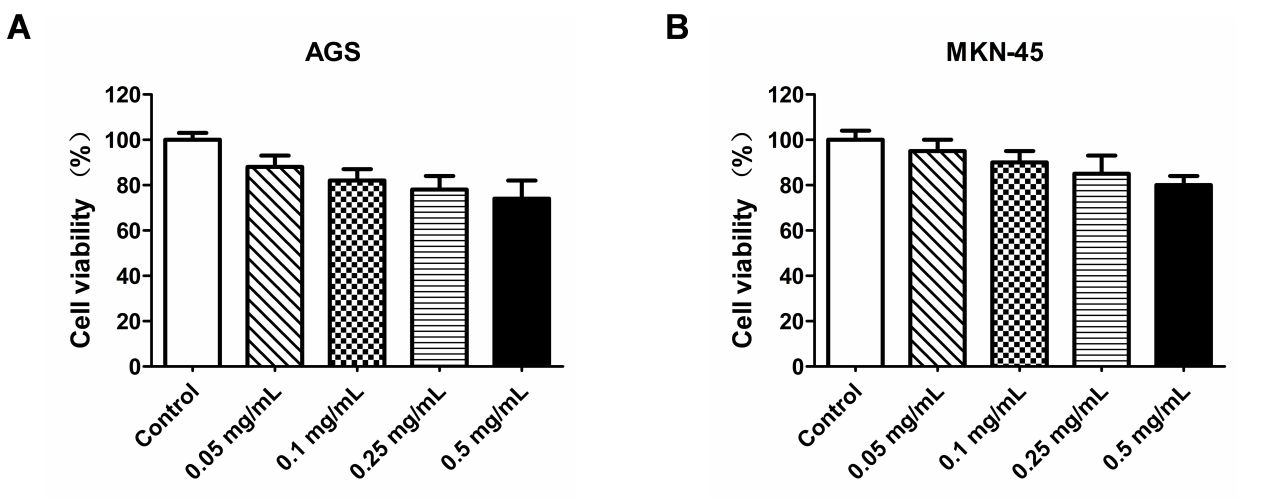
**

**Supplementary Figure. S1** Cytotoxicity of CuS-NiS2. (A) AGS and MKN-45 (B) cells were stimulated with 0.05 to 0.5 mg/mL of CuS–NiS2 for 4 h, and cell viability was tested by CCK-8 assay.


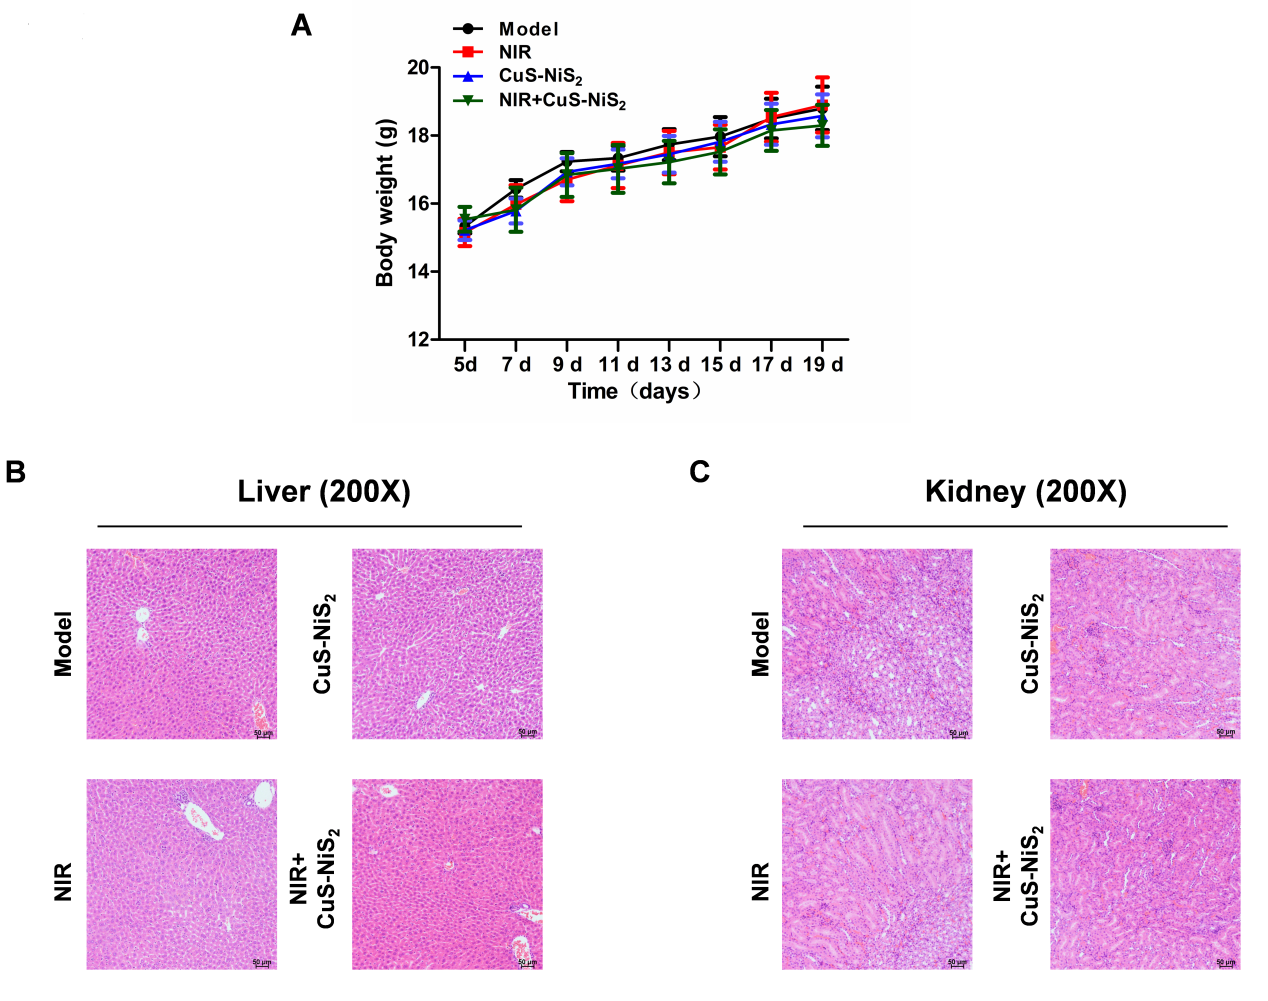


**Supplementary Figure. S2** *in vivo* toxicity of CuS-NiS2. (A) The body growth curves of mice of each group after the treatment in the following 14 days. (B, C) H&E staining of livers (B) and kidneys (C) from each group were measured 15d after the combination of CuS-NiS2 and NIR laser treatment.


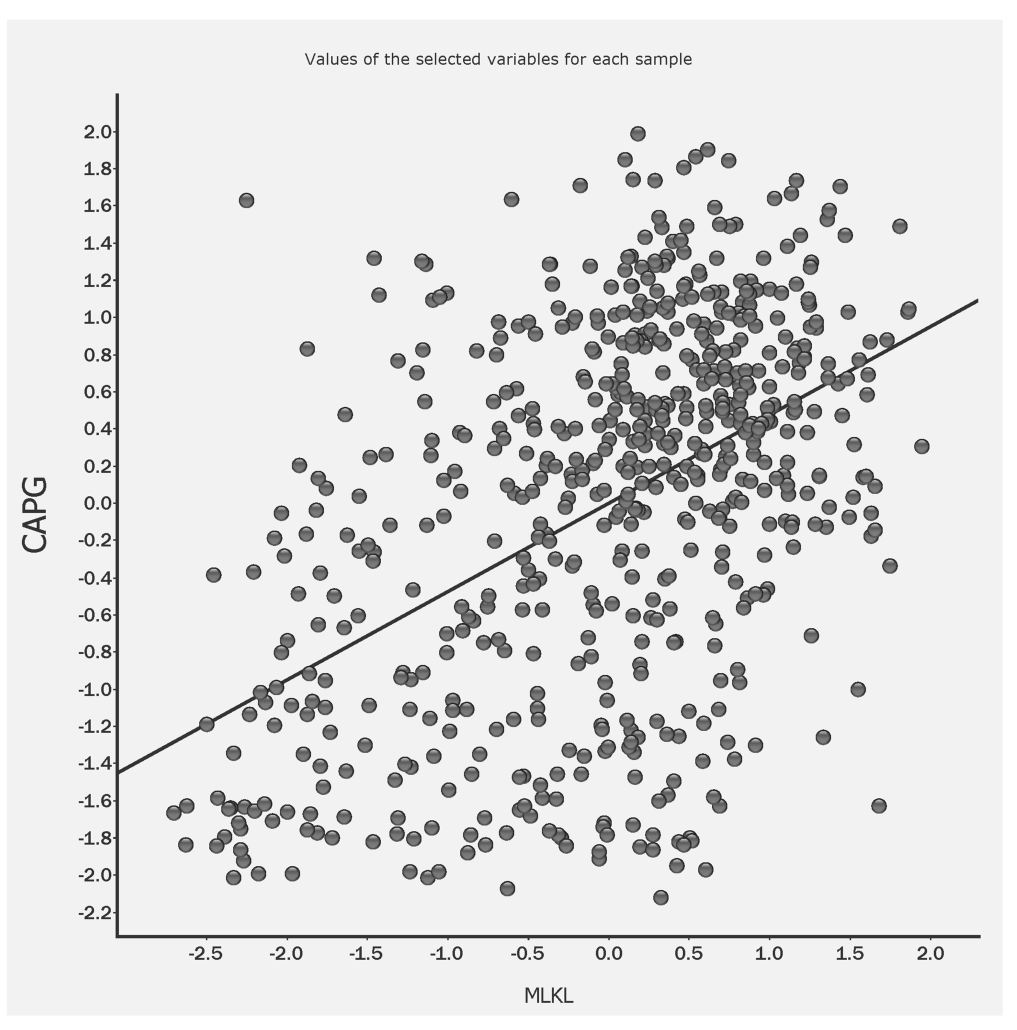


**Supplementary Figure. S3** Correlation analysis between MLKL and CAPG. Data of gene expression profile obtained from the GSE57083 DataSet including 627 cell lines tested by AstraZeneca, and the analysis indicate that CAPG exists strong positive correlation with MLKL.


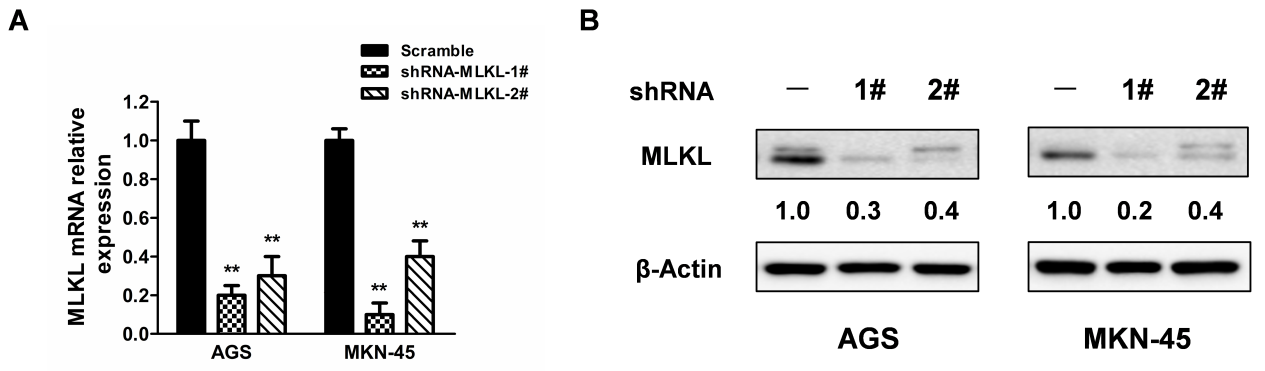


**Supplementary Figure. S4** knock down of MLKL with shRNAs. (A, B) qPCR and Western blotting showing the Mrna (A) and protein (B) levels of MLKL after knock down of MLKL in AGS and MKN-45 cells. ***P* < 0.01vs scramble (control).
